# Supplementary material
Source: Royal Society of Chemistry journal article supplement (doi:10.1039/d6tb01082b)
Supplement: d6tb01082b1.pdf [file d6tb01082b1.pdf]

## Supporting Information

### **Bioactive powder adhesive featuring clotting synergy for alveolar extraction socket hemostasis and regeneration**

Mingpu Sun<sup>1,†</sup>, Danyang Wang<sup>2,†</sup>, Chuanchuan Fan<sup>1</sup>, Chunyan Cui<sup>1\*</sup>, Qihui Zhou<sup>2\*</sup>, Wenguang Liu<sup>1\*</sup>

<sup>1</sup>School of Material Science and Engineering, Tianjin University, Tianjin 300350, China.

<sup>2</sup>Shandong Engineering Research Center for Tissue Rehabilitation Materials and Devices, Qingdao Key Laboratory of Smart Rehabilitation Material, School of Rehabilitation Sciences and Engineering, University of Health and Rehabilitation Sciences, Qingdao, 266113, China.

<sup>†</sup>These authors contributed equally to this work.

\*E-mail addresses: [cycui@tju.edu.cn](mailto:cycui@tju.edu.cn); [zhouqihui521@163.com](mailto:zhouqihui521@163.com); [wgliu@tju.edu.cn](mailto:wgliu@tju.edu.cn)

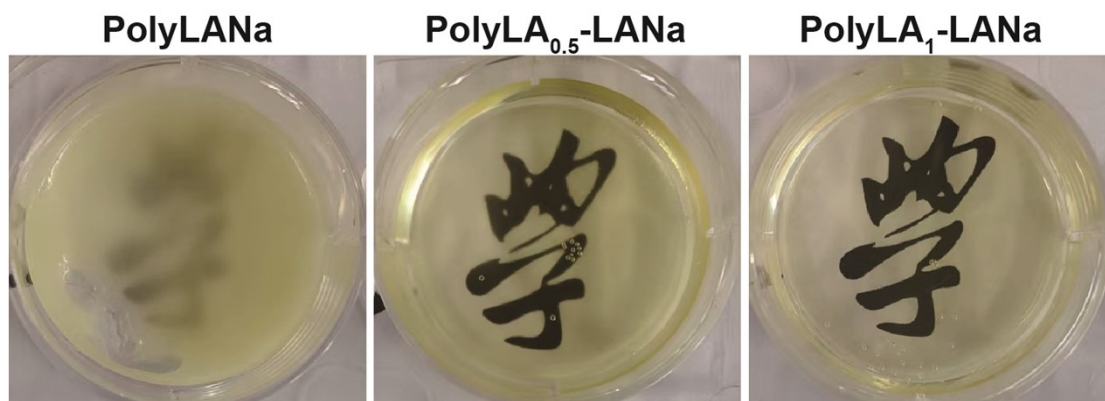

**Figure S1.** Representative photographs of dry PolyLANa, dry PolyLA<sub>0.5</sub>-LANa, and dry PolyLA<sub>1</sub>-LANa.

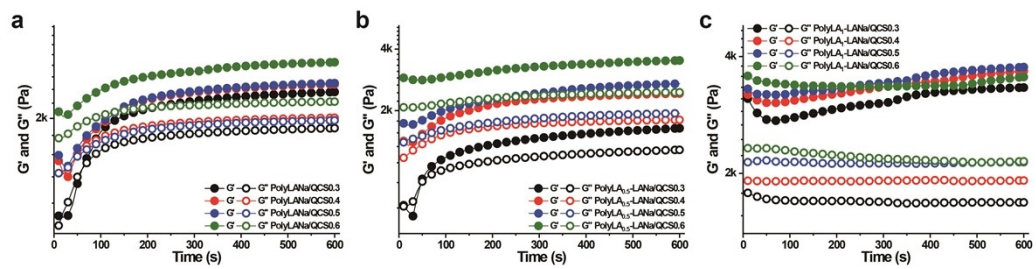

**Figure S2.** Rheological time sweep curves of the PolyLANa/QCSy (a), PolyLA<sub>0.5</sub>-LANa/QCSy (b), and PolyLA<sub>1</sub>-LANa/QCSy (c) composite powders.

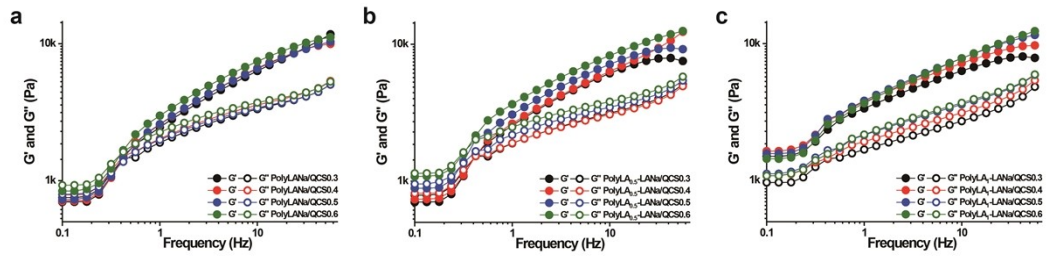

**Figure S3.** Rheological frequency sweep curves of the PolyLANa/QCSy (a), PolyLA<sub>0.5</sub>-LANa/QCSy (b), and PolyLA<sub>1</sub>-LANa/QCSy (c) composite powders.

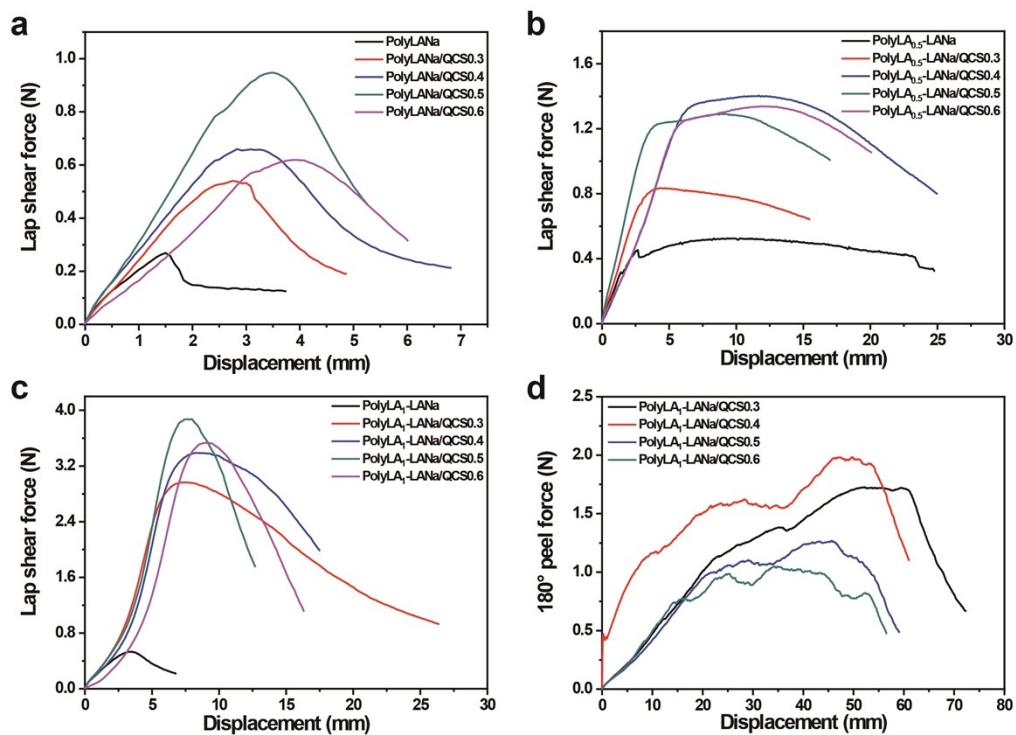

**Figure S4.** (a-c) Lap shear force-displacement curves obtained during lap shear testing on wet porcine skin for PolyLANa and PolyLANa/QCSy (a), PolyLA<sub>0.5</sub>-LANa and PolyLA<sub>0.5</sub>-LANa/QCSy (b), and PolyLA<sub>1</sub>-LANa and PolyLA<sub>1</sub>-LANa/QCSy (c); (d) 180° peel force-displacement curves of PolyLA<sub>1</sub>-LANa/QCSy on wet porcine skin for the evaluation of interface toughness.

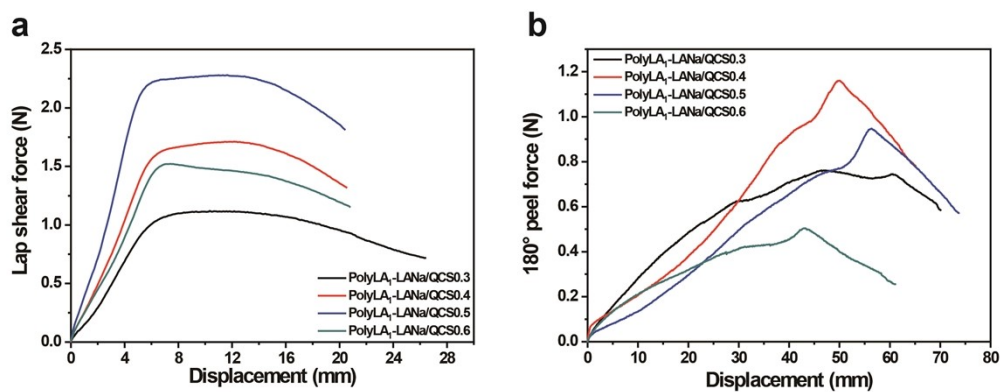

**Figure S5.** (a) Lap shear force-displacement curves obtained during lap shear testing on blood-covered porcine skin for PolyLA<sub>1</sub>-LANa/QCSy; (b) 180° peel force-displacement curves of PolyLA<sub>1</sub>-LANa/QCSy on blood-covered porcine skin for the evaluation of interface toughness.

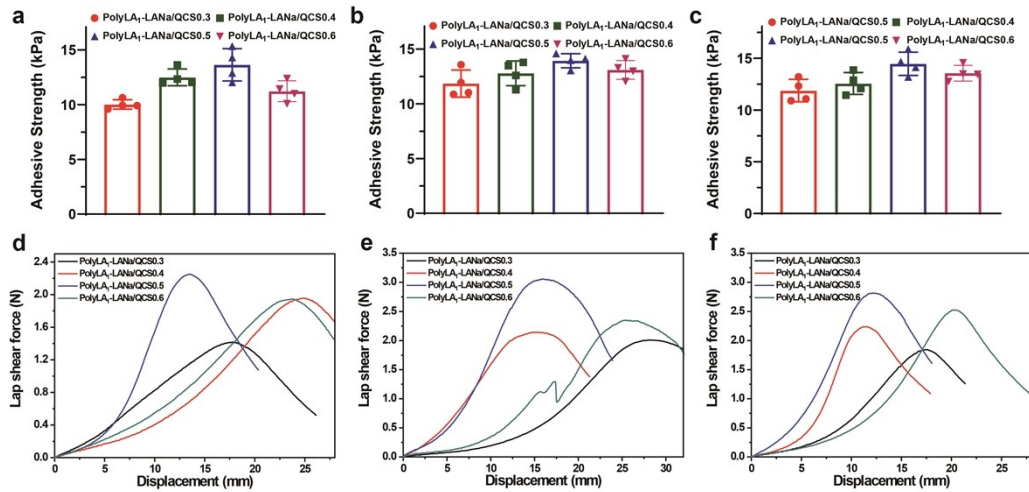

**Figure S6.** (a-c) Adhesive strength of the PolyLA<sub>1</sub>-LANa/QCS<sub>y</sub> composite powders evaluated in a wet environment on diverse biological surfaces: stomach (a), muscle (b), and heart muscle (c) ( $n = 4$ ); (d-f) Lap shear force-displacement curves obtained during the tensile testing corresponding to the adhesion on the stomach (d), muscle (e), and heart muscle (f) for PolyLA<sub>1</sub>-LANa/QCS<sub>y</sub>.

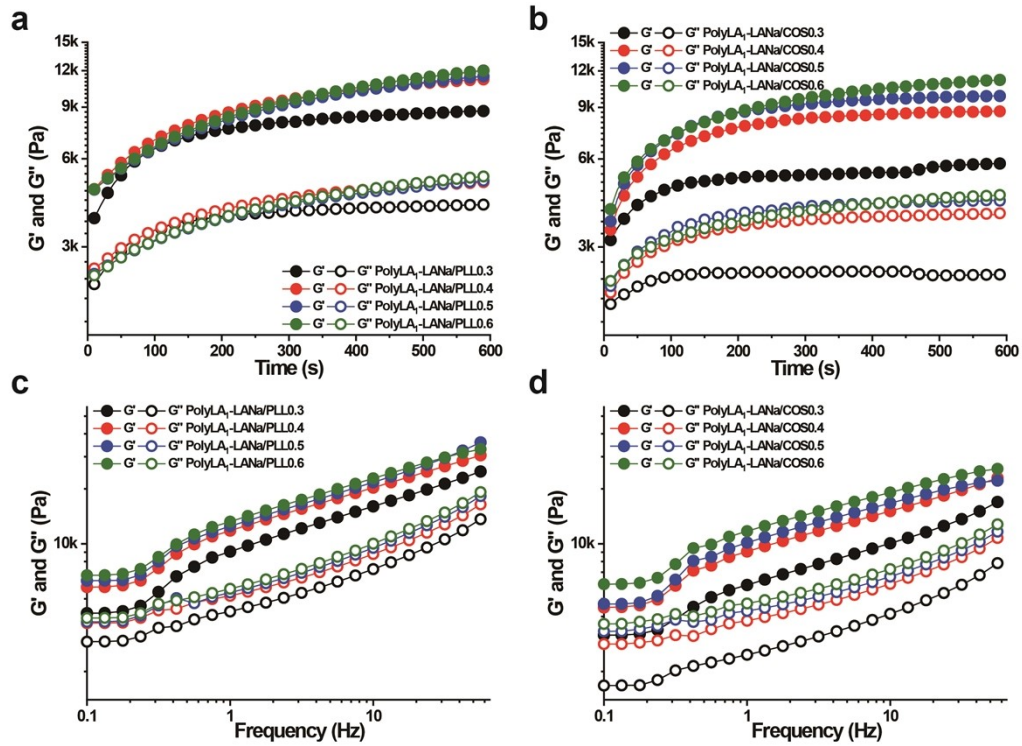

**Figure S7.** Rheological time sweep curves of PolyLA<sub>1</sub>-LANa/PLL and PolyLA<sub>1</sub>-LANa/COS composite powders (a, b); Rheological frequency sweep curves of PolyLA<sub>1</sub>-LANa/PLL and PolyLA<sub>1</sub>-LANa/COS composite powders (c, d)

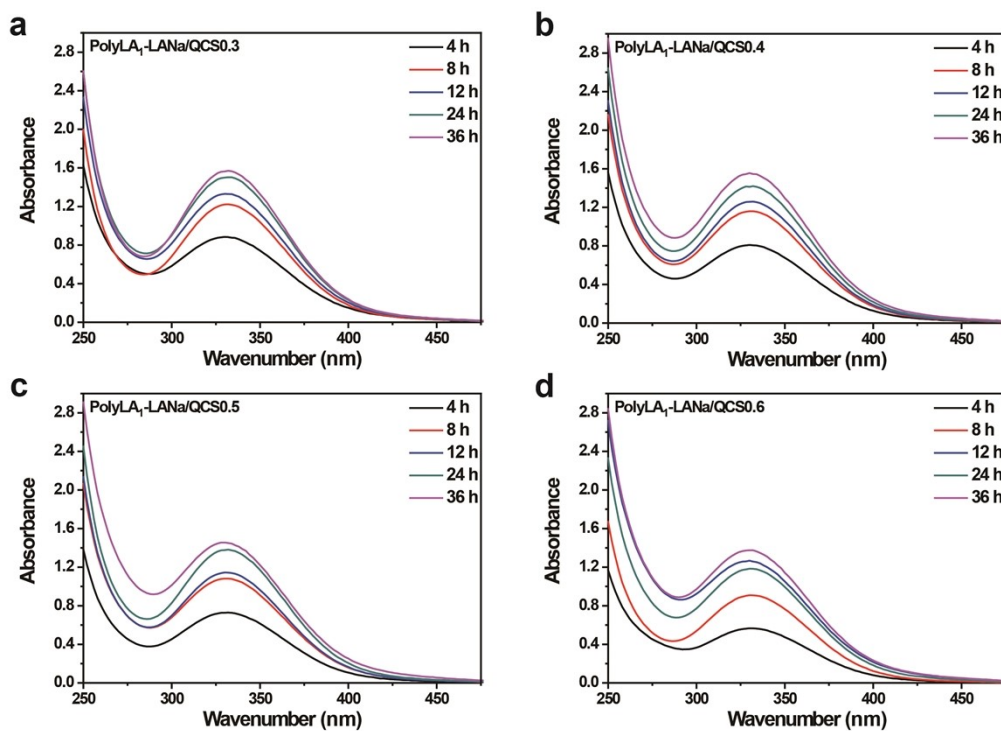

**Figure S8.** (a-d) UV-Vis absorbance spectra recorded from PolyLA<sub>1</sub>-LANa/QCSy with different compositions at specific time intervals (4, 8, 12, 24, and 36 h) in an aqueous environment to evaluate the *in vitro* release kinetics of LANa monomers from the composite powders.

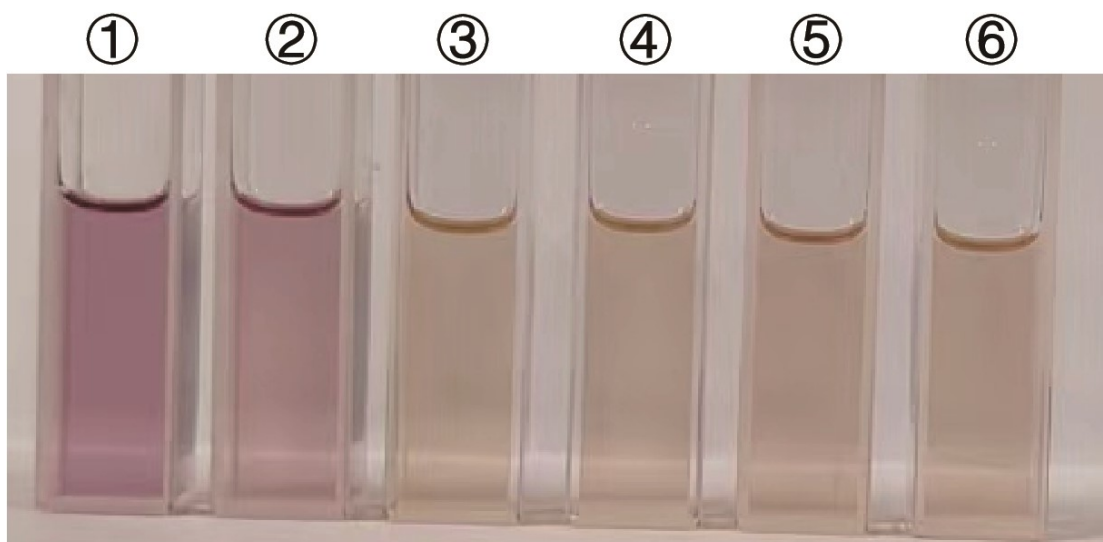

**Figure S9.** Macroscopic colorimetric visualization of the DPPH radical clearance assay for pure QCS and PolyLA<sub>1</sub>-LANa/QCSy composite powders. The photograph illustrates the visual color transitions of the DPPH solutions after incubation with the corresponding samples. From left to right: ① Control; ② Pure QCS; ③ PolyLA<sub>1</sub>-LANa/QCS0.3; ④ PolyLA<sub>1</sub>-LANa/QCS0.4; ⑤ PolyLA<sub>1</sub>-LANa/QCS0.5 and ⑥ PolyLA<sub>1</sub>-LANa/QCS0.6.

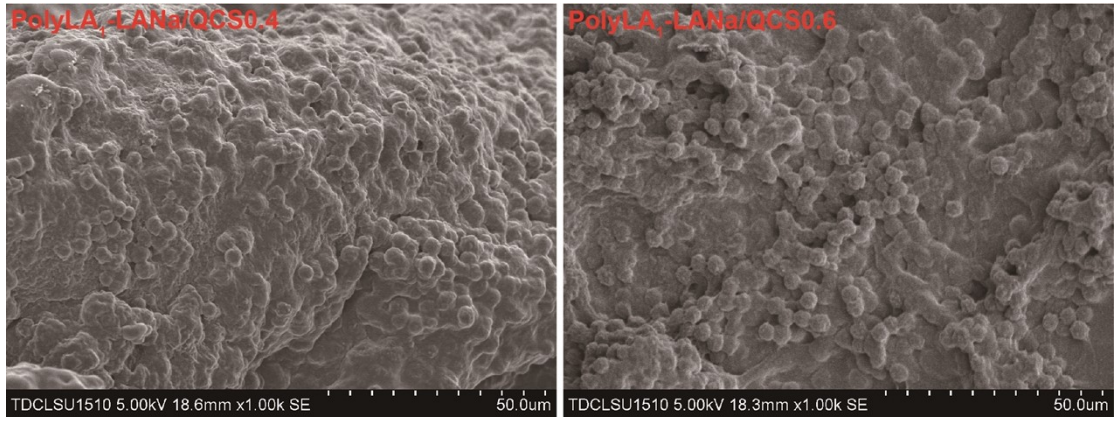

**Figure S10.** SEM images illustrating the aggregation and characteristic morphology of RBCs adhered to PolyLA<sub>1</sub>-LANa/QCS0.4 and PolyLA<sub>1</sub>-LANa/QCS0.6 (Scale bars: 50  $\mu$ m).

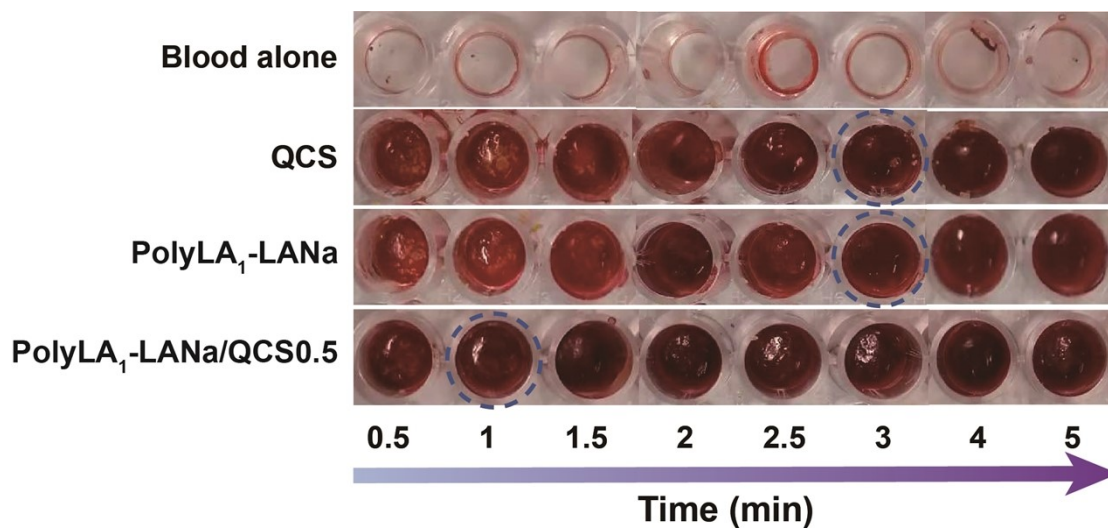

**Figure S11.** Macroscopic observation of the in vitro whole blood clotting time assay. Representative photograph illustrates the dynamic blood clotting process over a 5-minute period. The image compares the visual clotting status of the blood alone (blank control), pure QCS, PolyLA<sub>1</sub>-LANa, and PolyLA<sub>1</sub>-LANa/QCS0.5 composite powder at specific time intervals.

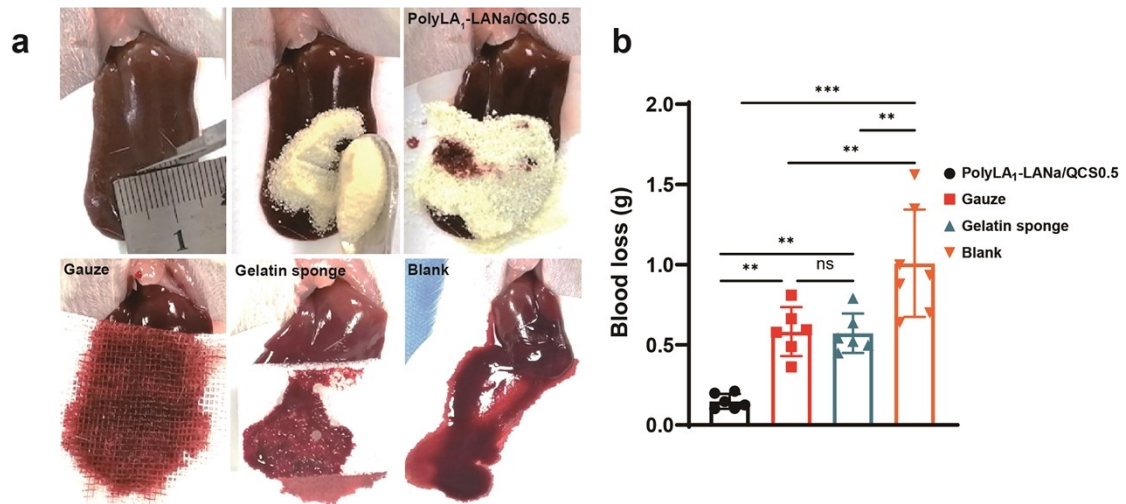

**Figure S12.** (a) Macroscopic photographs illustrating the hemostatic treatment of a rat liver injury model using commercial gauze, gelatin sponge, and PolyLA<sub>1</sub>-LANa/QCS0.5 composite powder; (b) Quantitative analysis of total blood loss in a rat liver injury model ( $n = 6, 7$ ) (\*\* $p < 0.01$ , \*\*\* $p < 0.001$  and "ns" denotes no significant difference).

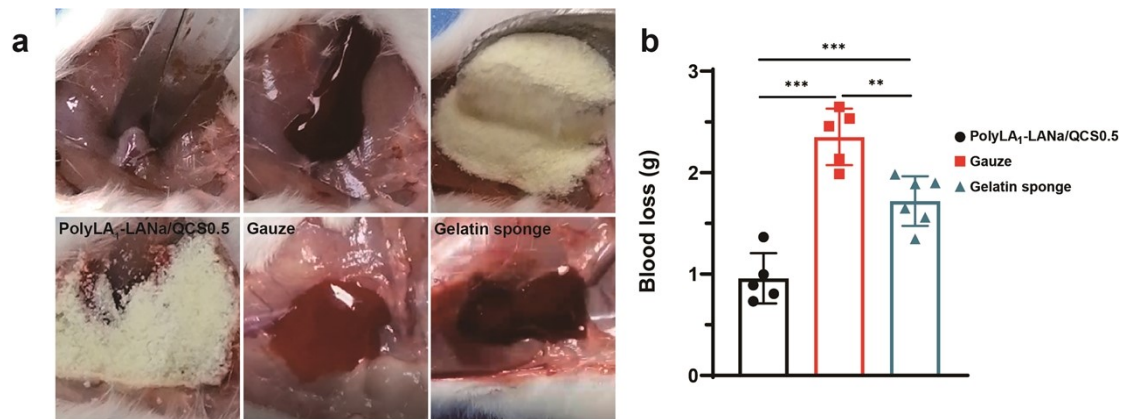

**Figure S13.** (a) Macroscopic photographs illustrating the hemostatic treatment of a rat muscle and blood vessel injury model using commercial gauze, gelatin sponge, and PolyLA<sub>1</sub>-LANa/QCS0.5 composite powder; (b) Quantitative analysis of total blood loss in a rabbit muscle and blood vessel injury model ( $n = 6$ ) (\*\* $p < 0.01$ , \*\*\* $p < 0.001$ ).

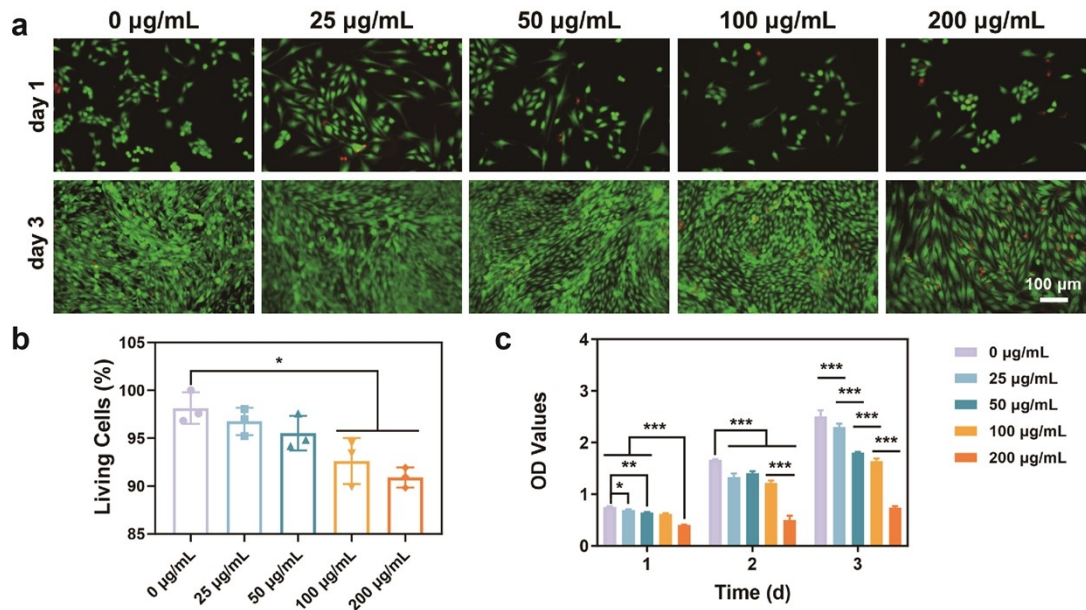

**Figure S14.** (a) Live/Dead staining images and the proportion of living cells of MC3T3-E1 cells co-cultured with PolyLA<sub>1</sub>-LANa/QCS0.5 for 1 and 3 days; (b) Cell viability of MC3T3-E1 cells co-cultured with PolyLA<sub>1</sub>-LANa/QCS0.5 for 1 and 3 days; (c) OD values of MC3T3-E1 cells co-cultured with PolyLA<sub>1</sub>-LANa/QCS0.5 for 1 and 3 days (\* $p < 0.05$ , \*\* $p < 0.01$ , \*\*\* $p < 0.001$ ).

**Video S1.** Rat femoral artery puncture model—PolyLA<sub>1</sub>-LANa/QCS0.5

**Video S2.** Rat femoral artery puncture model—Gelatin sponge

**Video S3.** Rat femoral artery puncture model—Gauze

**Video S4.** Rat muscle and blood vessel injure model—PolyLA<sub>1</sub>-LANa/QCS0.5

**Video S5.** Rat muscle and blood vessel injure model—Gelatin sponge

**Video S6.** Rat muscle and blood vessel injure model—Gauze

**Video S7.** PolyLA<sub>1</sub>-LANa/QCS0.5 tightly seals the bleeding site after hemostasis

**Video S8.** Rabbit femoral artery puncture model—PolyLA<sub>1</sub>-LANa/QCS0.5

**Video S9.** Rabbit femoral artery puncture model—Gelatin sponge

**Video S10.** Rabbit femoral artery puncture model—Gauze
